# Supplementary material for: Engineering work function of graphene oxide from p to n type using a low power atmospheric pressure plasma jet
Source: Royal Society of Chemistry journal article supplement (doi:10.1039/c9cp06174f), 2020-01-01
Supplement: c9cp06174f1.pdf [file c9cp06174f1.pdf]

## Supporting information

# Engineering work function of graphene oxide from p to n type using a low power atmospheric pressure plasma jet

*Avishek Dey<sup>1</sup>, Paheli Ghosh<sup>1</sup>, James Bowen<sup>1</sup>, N.S Braithwaite<sup>2</sup> and Satheesh Krishnamurthy<sup>1,\*</sup>*

<sup>1</sup>School of Engineering and Innovation, The Open University, Milton Keynes, MK7 6AA, UK

<sup>2</sup>School of Physical Sciences, The Open University, Milton Keynes, MK7 6AA, UK

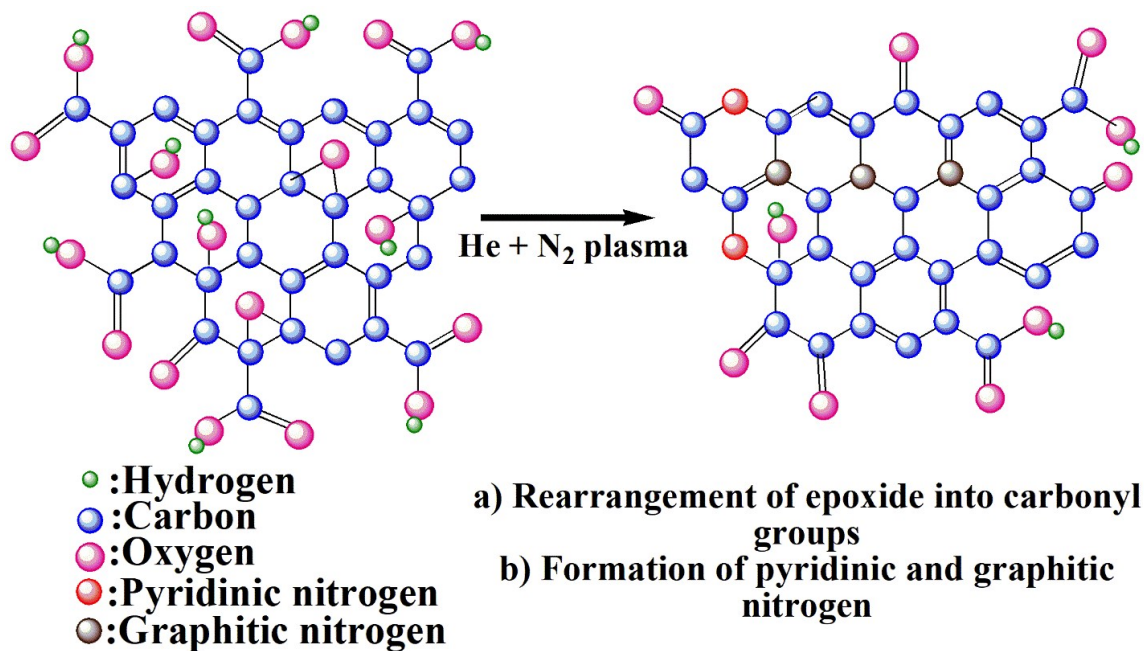

**Figure S1.** Nitrogen doping of GO films using  $\text{He}^+\text{N}_2$  plasma jet. Structure on the right hand side shows the various configurations of doped nitrogen in the graphitic lattice.

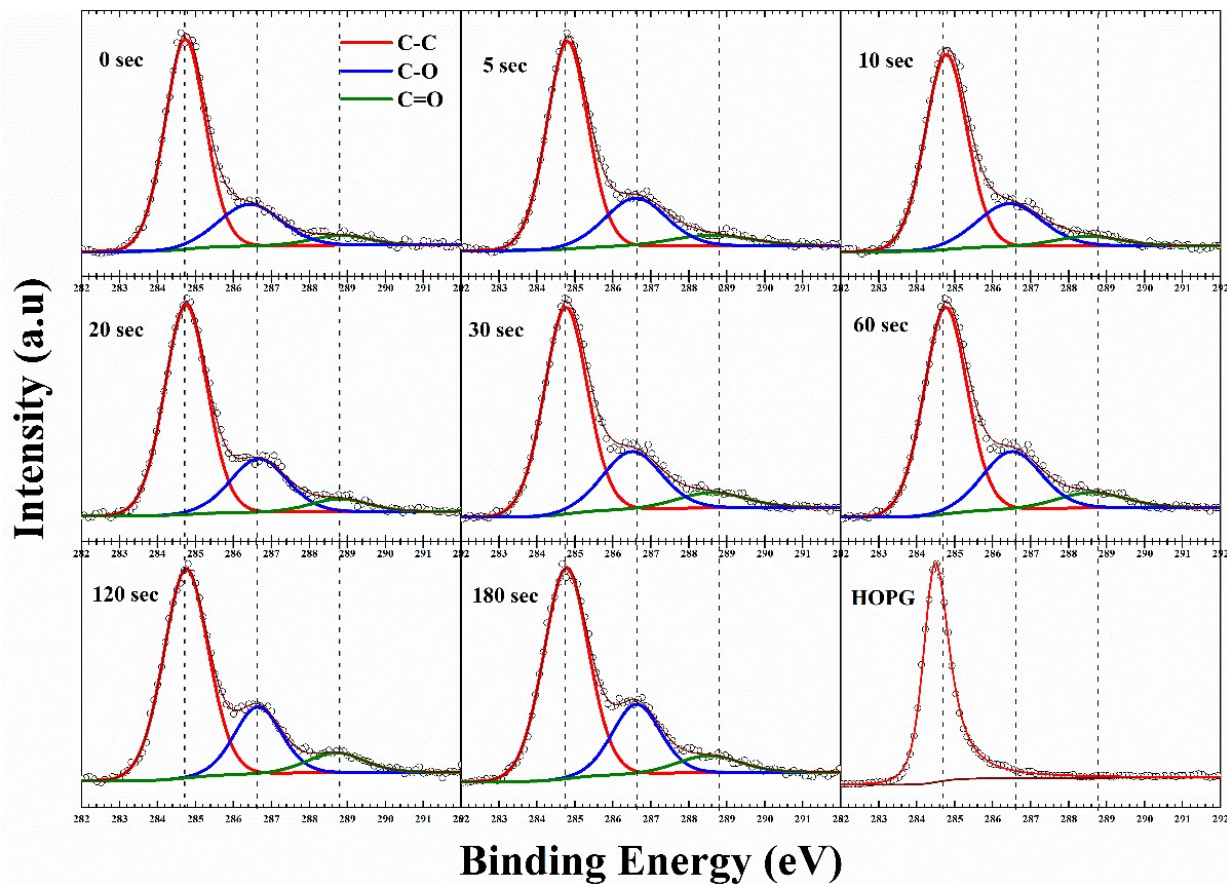

**Figure S2.** Fitted  $\text{C}1s$  spectra of GO, functionalized GO and HOPG. The peak intensities of all spectra have been normalized to one unit. C-C represents the carbon-carbon bonds, C-O represent carbon single bonded to oxygen and C=O represent carbon double bonded to oxygen.

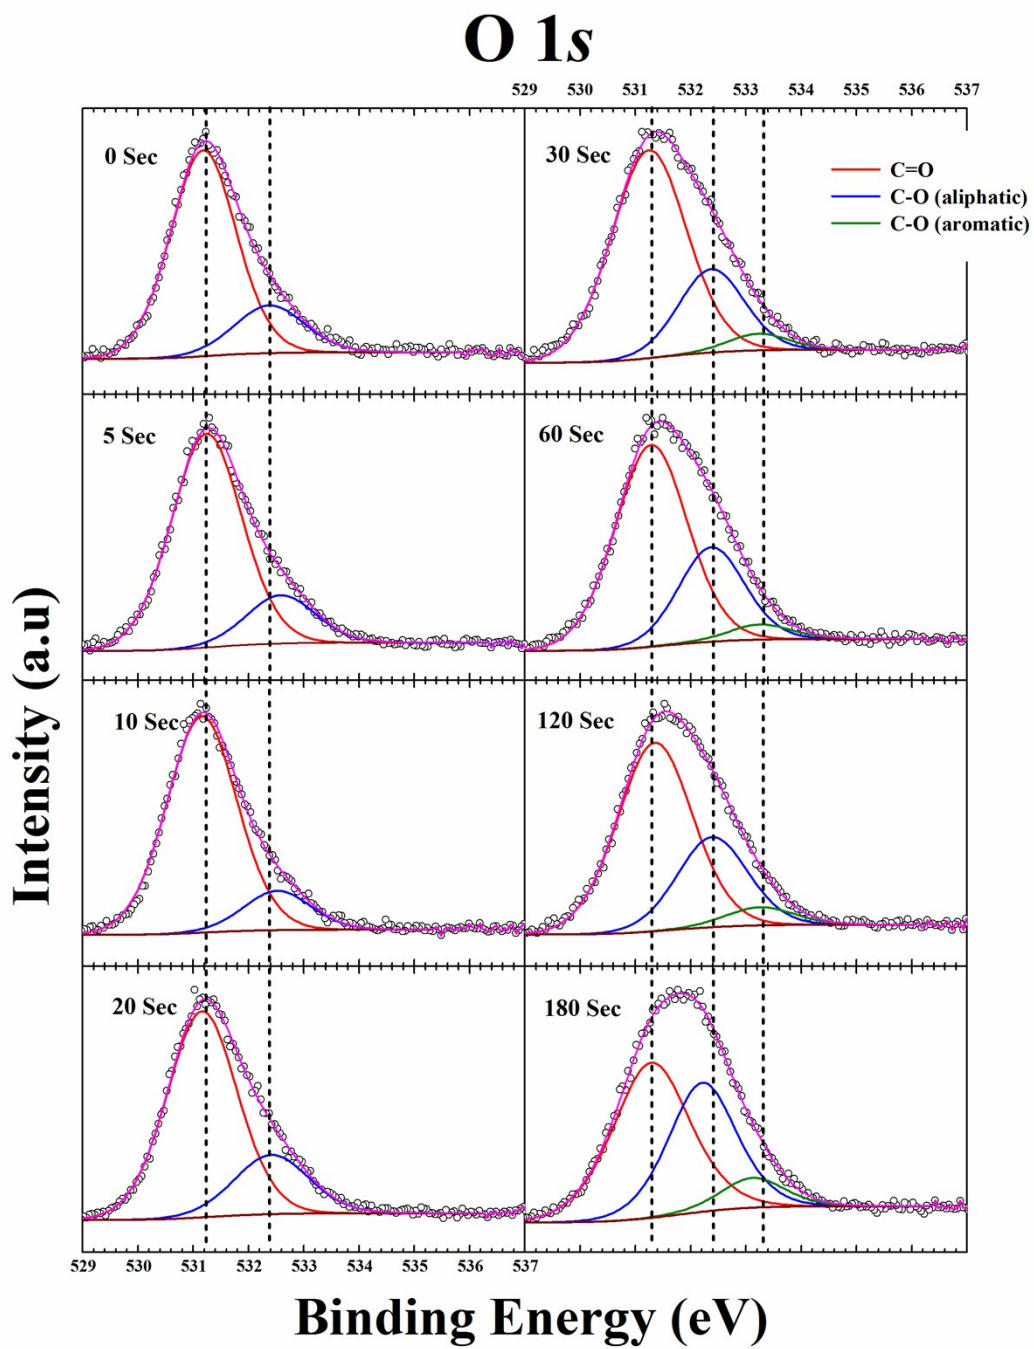

Figure S3. Fitted O1s spectra of GO (0 sec) and plasma functionalized GO for 5 to 180 seconds.

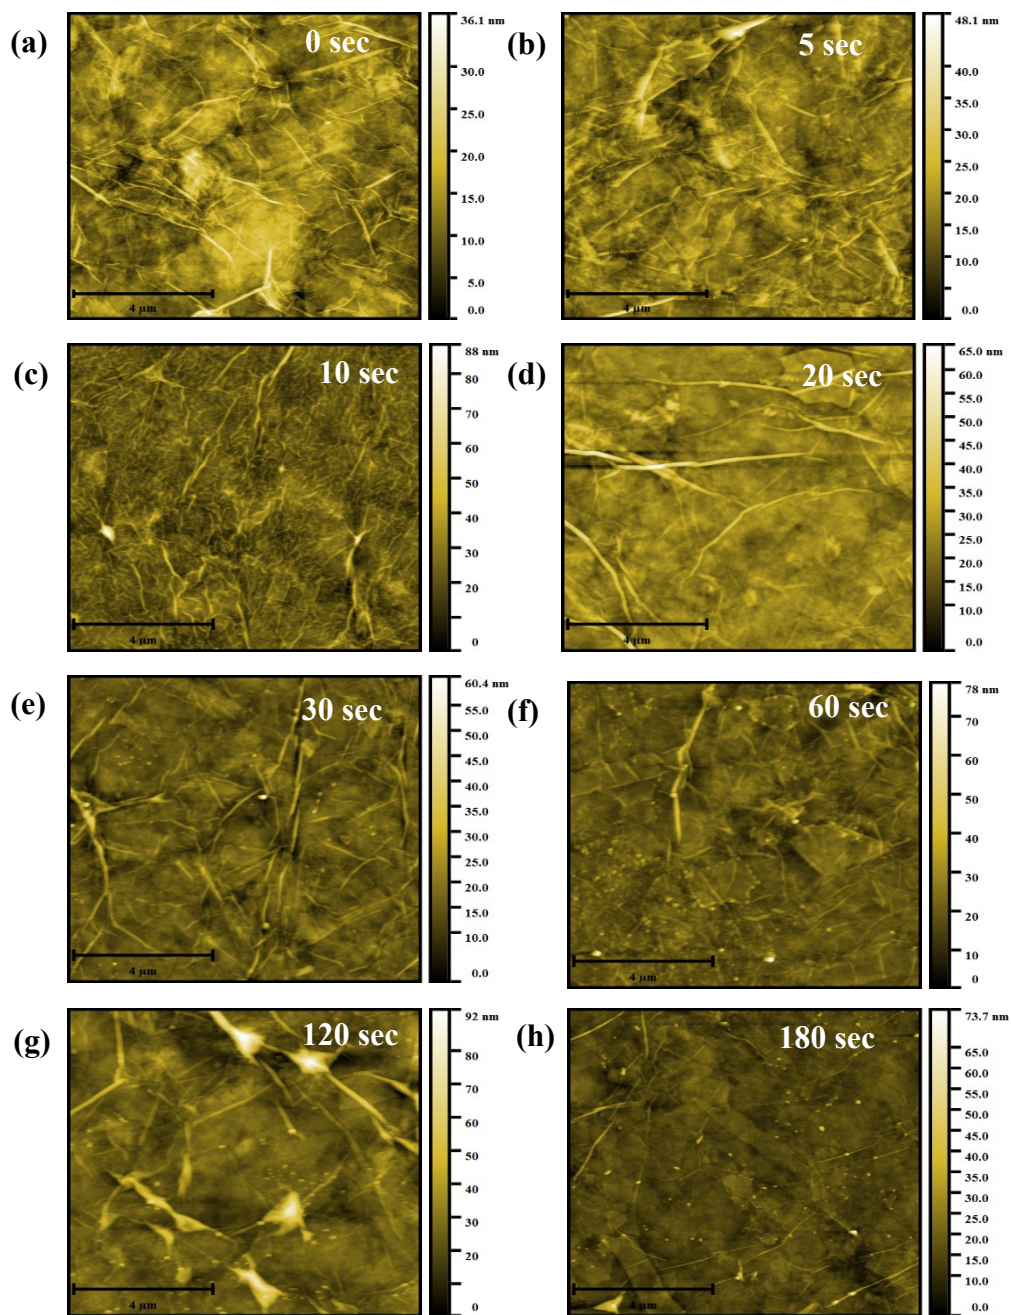

**Figure S4.** Tapping mode AFM height images of (a) drop-cast GO film, (b) to (h) plasma functionalized GO for varying time intervals. No substantial changes in surface roughness could

be observed from these height images. The average roughness value of all the samples were calculated to be  $3\pm 0.5$  nm.

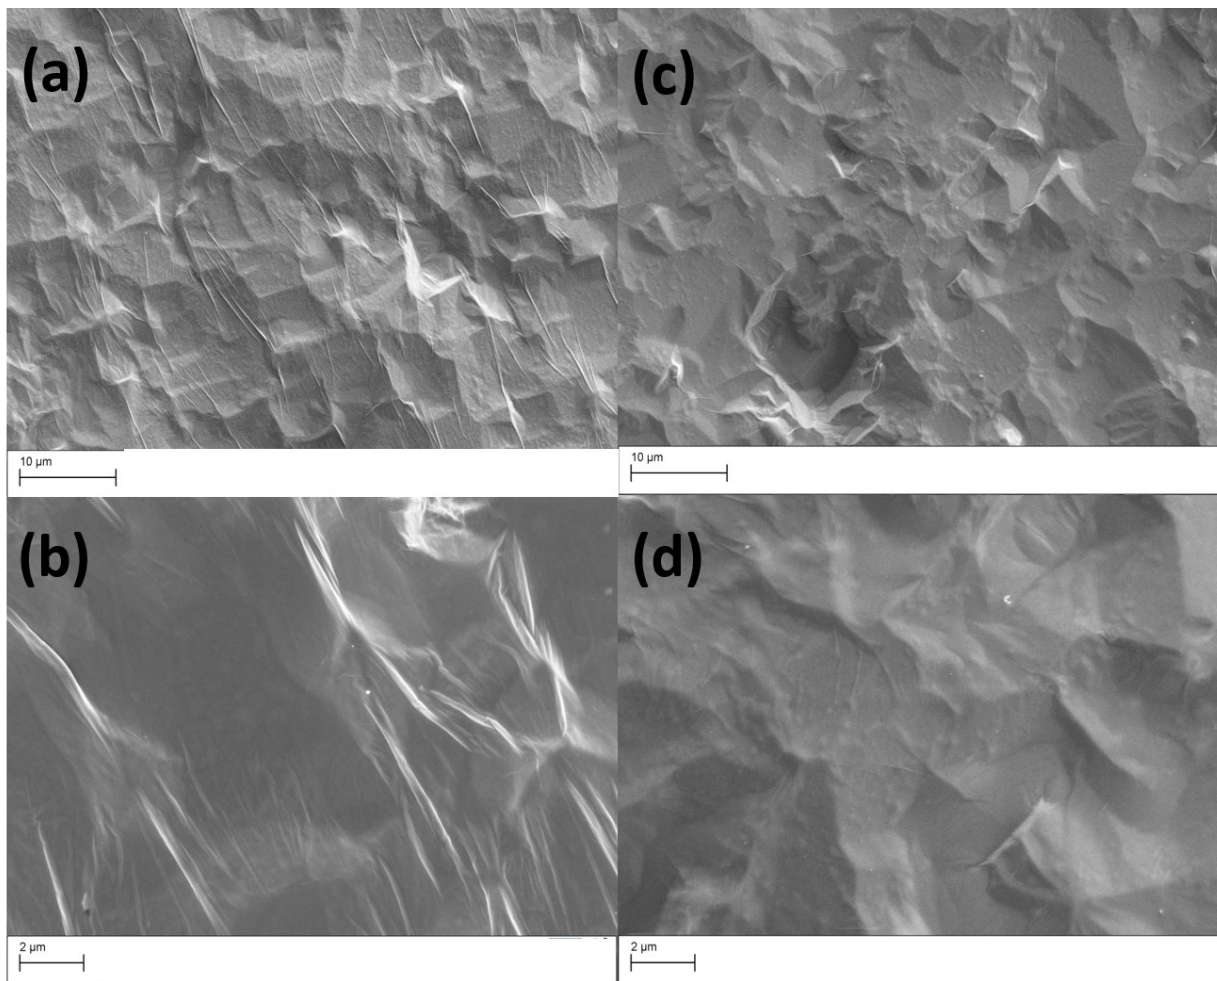

**Figure S5.** Scanning electron microscope images of (a),(b) as synthesised GO films and (c), (d) films plasma functionalised for 180 secs. The plasma functionalisation doesnot introduce morphological changes.

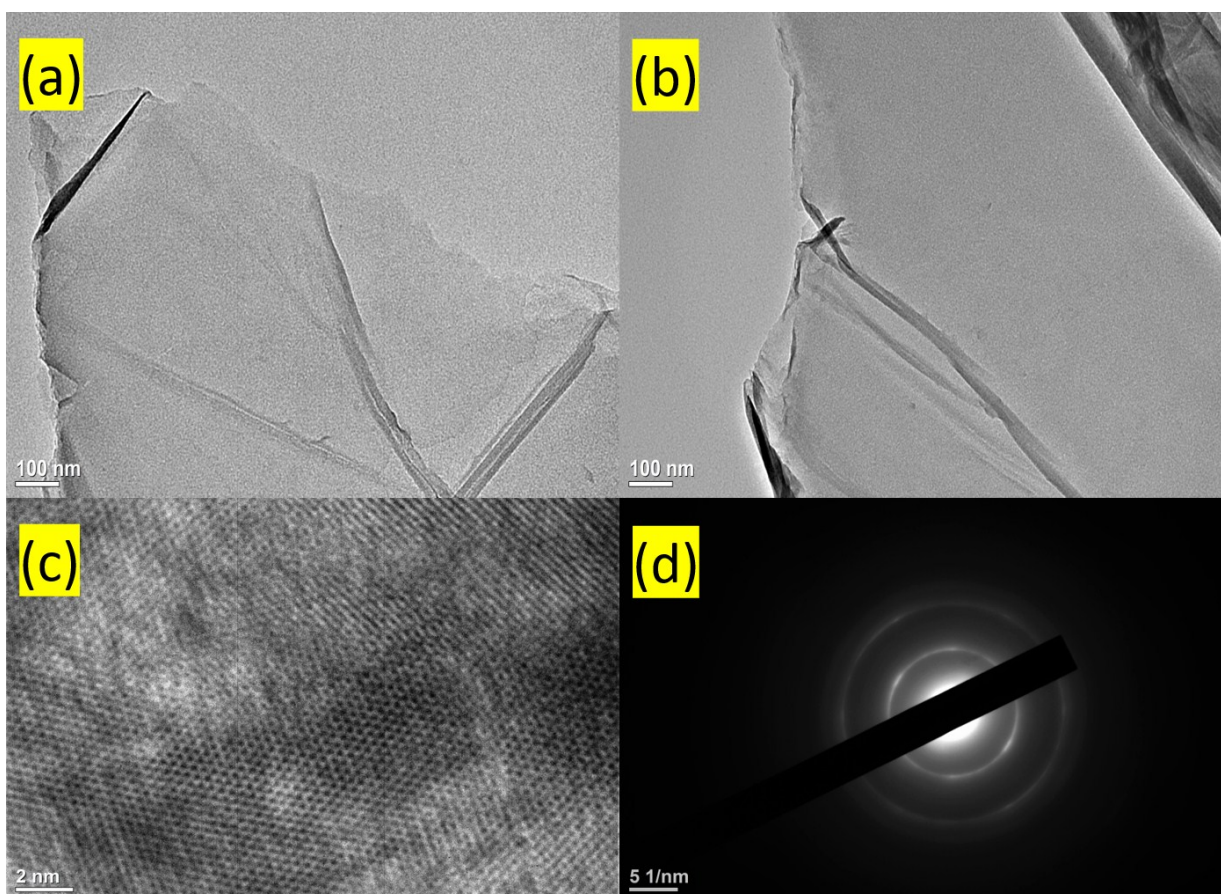

**Figure S6.** Transmission electron microscope images of (a),(b) as synthesised GO on lacy carbon grids, (c), high resolution image of exfoliated GO (d) Electron diffraction pattern from the GO film.
